# Supplementary material for: DDA simulations of noble metal and alloy nanocubes for tunable optical properties in biological imaging and sensing
Source: Royal Society of Chemistry journal article supplement (doi:10.1039/c3ra41684d), 2013-01-01
Supplement: c3ra41684d.pdf [file c3ra41684d.pdf]

Supplemental Information

## DDA simulations of noble metal and their alloy nanocubes for tunable optical properties in biological imaging and sensing

Jagmeet Singh Sekhon<sup>a\*</sup>, Hitendra K. Malik<sup>b</sup>, and S. S. Verma<sup>a</sup>

<sup>a</sup>Department of Physics, Sant Longowal Institute of Engineering and Technology Longowal (SLIET), District - Sangrur, (Punjab) —148-106, India

Telephone number: +91-1672-305316; Fax +91-1672-280057, +91-1672-305186

<sup>b</sup>Department of Physics, Indian Institute of Technology (IIT) Delhi, New Delhi – 110016, India

\*Corresponding author email: - [jagmeetsekhon@ymail.com](mailto:jagmeetsekhon@ymail.com)

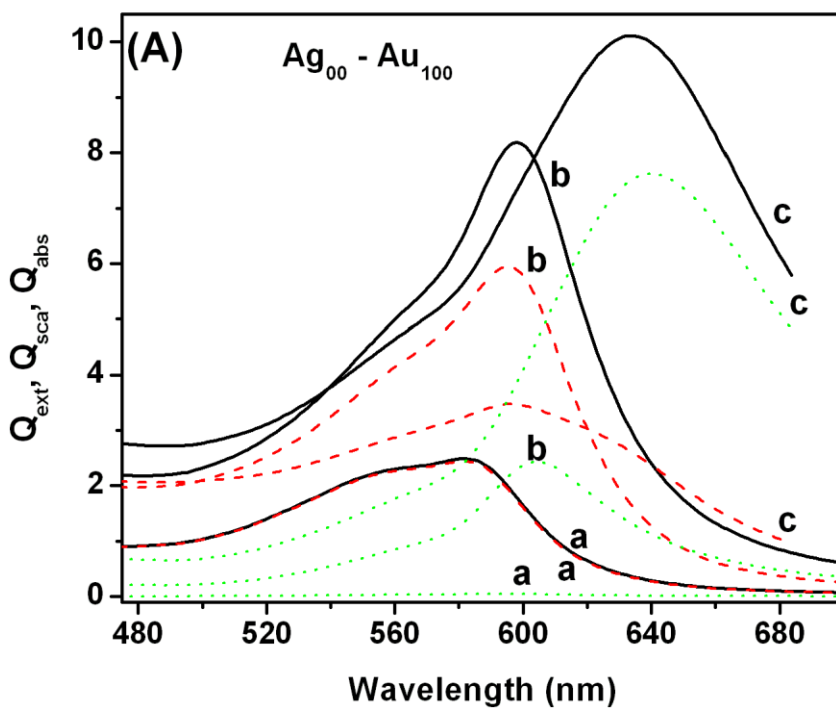

Figure S1A

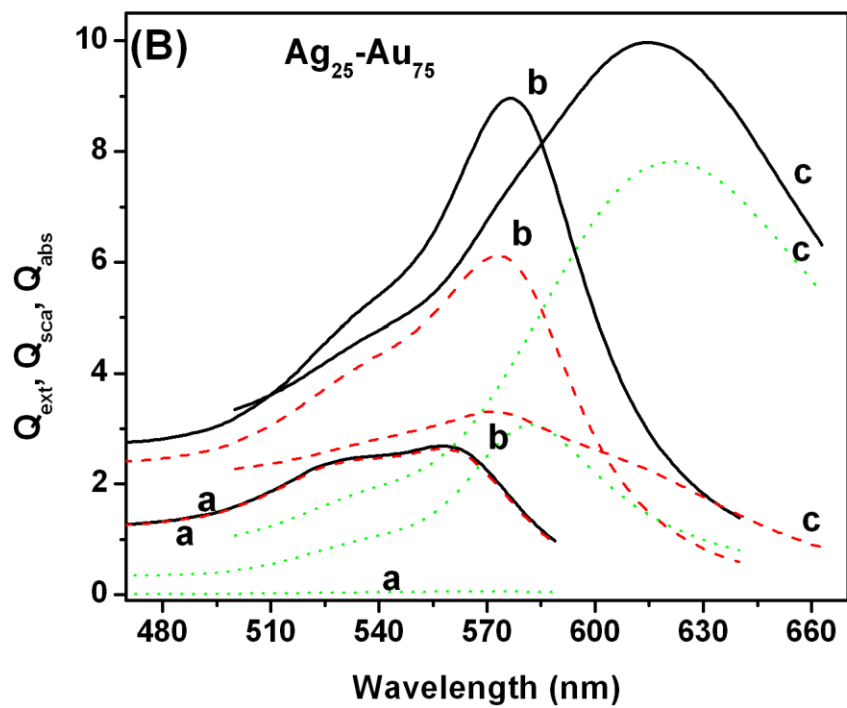

Figure S1B

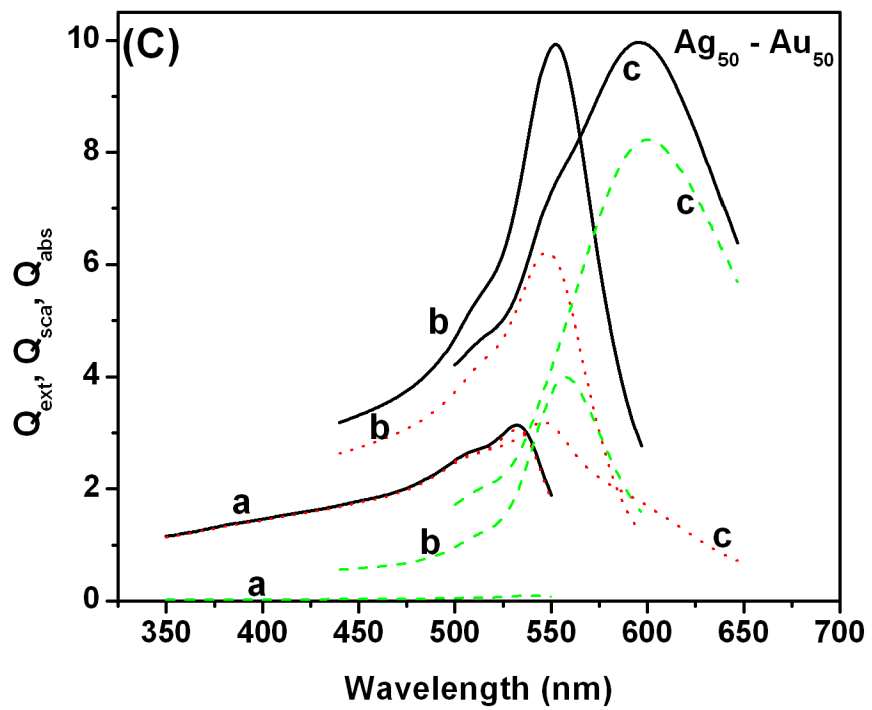

Figure S1C

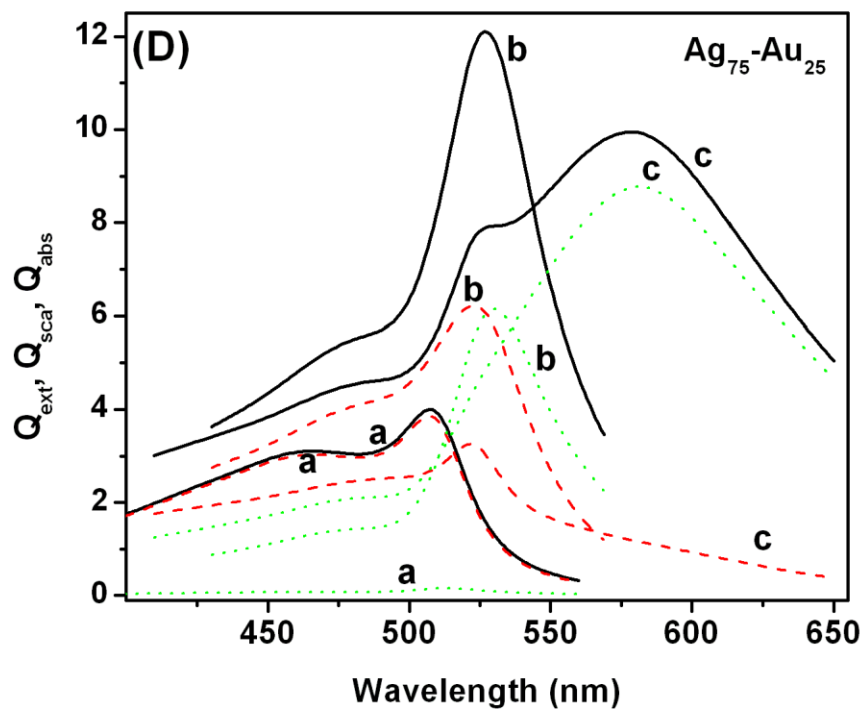

Figure S1D

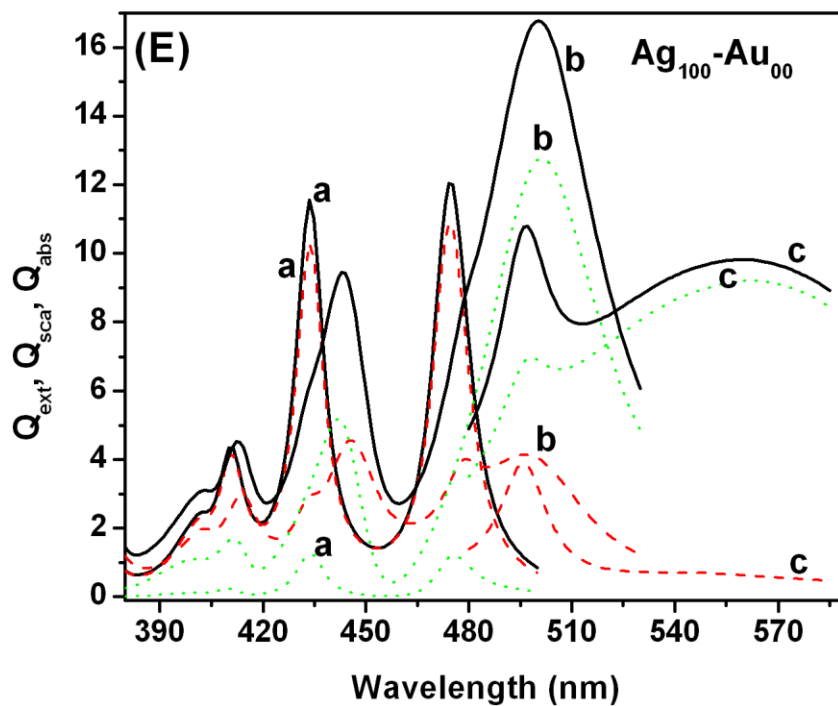

Figure S1E

**Figure S1:** Calculated efficiency spectra of extinction  $Q_{\text{ext}}$  (solid black lines), scattering  $Q_{\text{sca}}$  (dotted green lines), and  $Q_{\text{abs}}$  (dashed red lines) for edge length of (a) 20 nm; (b) 50 nm; (c) 80 nm of (A)  $\text{Ag}_{00}\text{-Au}_{100}$  (B)  $\text{Ag}_{25}\text{-Au}_{75}$  (C)  $\text{Ag}_{50}\text{-Au}_{50}$  (D)  $\text{Ag}_{75}\text{-Au}_{25}$  (E)  $\text{Ag}_{100}\text{-Au}_{00}$  alloys nanocubes.

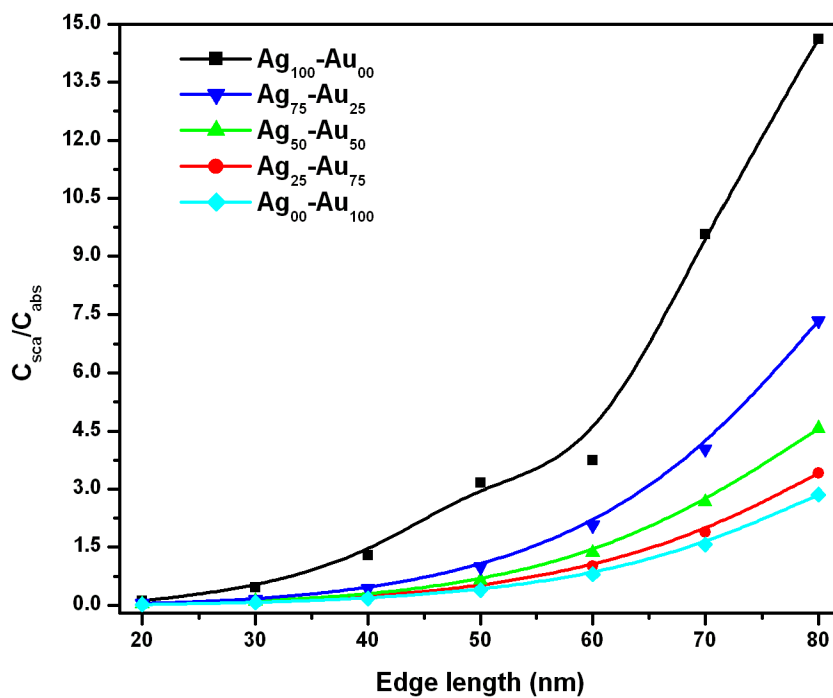

**Figure S2:** Variation in  $C_{sca}/C_{abs}$  of nanocubes with nanocube edge length.

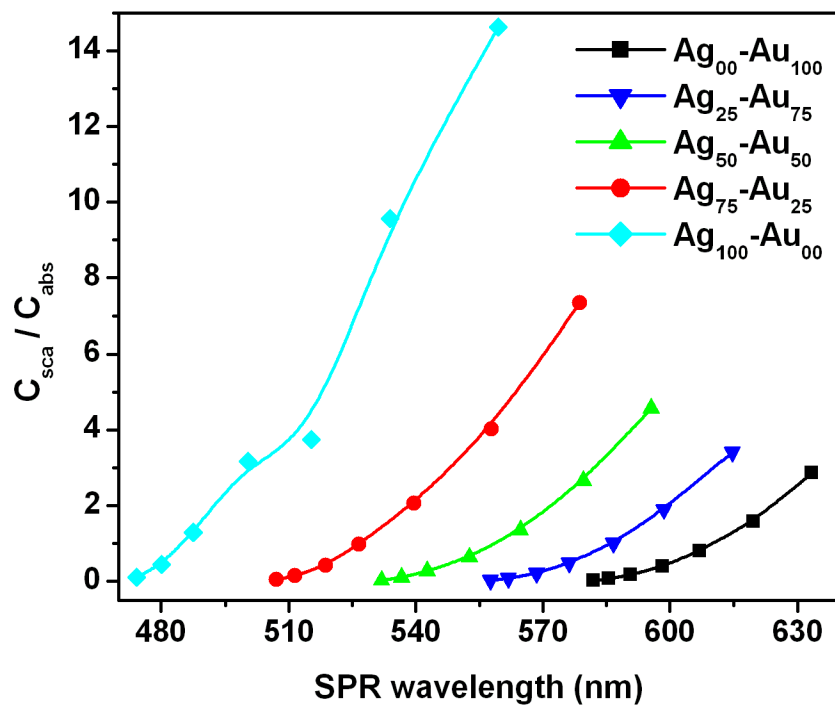

**Figure S3:** Variation in  $C_{sca}/C_{abs}$  of nanocubes with SPR wavelength.

**Table S1:** Calculated SPR wavelength (nm), ratio of scattering to absorption efficiency, refractive index sensitivity (nm/RIU) and FOM for Au, Au<sub>75</sub>-Ag<sub>25</sub>, Au<sub>50</sub>-Ag<sub>50</sub>, Au<sub>25</sub>-Ag<sub>75</sub>, Ag nanocubes of different width

| Width (nm) | $\lambda_{\text{SPR}}$ (nm)                                                                                           | $Q_{\text{sca}}/Q_{\text{abs}}$                                                                                       | RIS (nm/RIU)                                                                                                          | FOM                                                                                                                   |
|------------|-----------------------------------------------------------------------------------------------------------------------|-----------------------------------------------------------------------------------------------------------------------|-----------------------------------------------------------------------------------------------------------------------|-----------------------------------------------------------------------------------------------------------------------|
|            | Au, Au <sub>75</sub> -Ag <sub>25</sub> , Au <sub>50</sub> -Ag <sub>50</sub> , Au <sub>25</sub> -Ag <sub>75</sub> , Ag | Au, Au <sub>75</sub> -Ag <sub>25</sub> , Au <sub>50</sub> -Ag <sub>50</sub> , Au <sub>25</sub> -Ag <sub>75</sub> , Ag | Au, Au <sub>75</sub> -Ag <sub>25</sub> , Au <sub>50</sub> -Ag <sub>50</sub> , Au <sub>25</sub> -Ag <sub>75</sub> , Ag | Au, Au <sub>75</sub> -Ag <sub>25</sub> , Au <sub>50</sub> -Ag <sub>50</sub> , Au <sub>25</sub> -Ag <sub>75</sub> , Ag |
| 20         | 581.9, 557.6, 531.91, 507.12, 474.26                                                                                  | 0.02, 0.02, 0.03, 0.04, 0.11                                                                                          | 170.82, 314.35, 362.6, 161.75, 209.65                                                                                 | 1.84, 3.16, 2.75, 1.43, 1.78                                                                                          |
| 30         | 585.7, 561.8, 536.64, 511.53, 480.11                                                                                  | 0.07, 0.08, 0.10, 0.14, 0.45                                                                                          | 176.0, 300.37, 360.2, 167.91, 219.52                                                                                  | 2.0, 3.43, 3.69, 1.83, 3.86                                                                                           |
| 40         | 590.7, 568.6, 542.73, 518.68, 487.52                                                                                  | 0.17, 0.21, 0.27, 0.42, 1.3                                                                                           | 188.11, 282.38, 275.12, 178.72, 234.68                                                                                | 2.27, 3.51, 3.55, 2.57, 3.58                                                                                          |
| 50         | 598.2, 576.2, 552.7, 526.57, 500.31                                                                                   | 0.39, 0.48, 0.64, 0.98, 3.16                                                                                          | 195.24, 274.95, 221.1, 188.95, 256.22                                                                                 | 2.43, 3.48, 2.89, 3.41, 3.08                                                                                          |
| 60         | 607.0, 586.7, 564.68, 539.58, 513.38                                                                                  | 0.8, 1.0, 1.35, 2.06, 3.75                                                                                            | 206.99, 277.37, 223.79, 204.6, 276.44                                                                                 | 2.46, 3.29, 2.92, 4.21, 2.8                                                                                           |
| 70         | 619.6, 598.6, 579.64, 557.81, 533.87                                                                                  | 1.57, 1.89, 2.66, 4.08, 9.57                                                                                          | 225.92, 294.9, 239.37, 232.06, 301.48                                                                                 | 2.34, 2.94, 2.64, 2.43, 2.65                                                                                          |
| 80         | 633.4, 614.6, 595.64, 578.73, 559.49                                                                                  | 2.85, 3.41, 4.57, 7.33, 14.62                                                                                         | 246.77, 302.7, 264.99, 260.66, 338.48                                                                                 | 2.18, 2.6, 2.18, 1.78, 3.28                                                                                           |
